# Supplementary material
Source: MDPI journal article supplement (https://www.mdpi.com/2311-7524/9/4/461)
Supplement: s1 [file s1]

# Antibacterial Activity of *Ginkgo biloba* Extracts against *Clavibacter michiganensis* subsp. *michiganensis*, *Pseudomonas* spp., and *Xanthomonas vesicatoria*

Eva Sánchez-Hernández <sup>1,\*</sup>, Vicente González-García <sup>2</sup>, Ana Palacio-Bielsa <sup>2</sup>, Belén Lorenzo-Vidal <sup>3</sup>, Laura Buzón-Durán <sup>1</sup>, Jesús Martín-Gil <sup>1</sup> and Pablo Martín-Ramos <sup>1</sup>

<sup>1</sup> Department of Agricultural and Forestry Engineering, ETSIIAA, Universidad de Valladolid, Avda. Madrid 44, 34004 Palencia, Spain

<sup>2</sup> Department of Agricultural, Forest and Environmental Systems, Agrifood Research and Technology Centre of Aragón, Instituto Agroalimentario de Aragón—IA2 (CITA-Universidad de Zaragoza), Avda. Montañana 930, 50059 Zaragoza, Spain

<sup>3</sup> Servicio de Microbiología, Hospital Universitario Río Hortega, Calle Dulzaina 2, 47012 Valladolid, Spain

\* Correspondence: eva.sanchez.hernandez@uva.es

## SUPPORTING INFORMATION

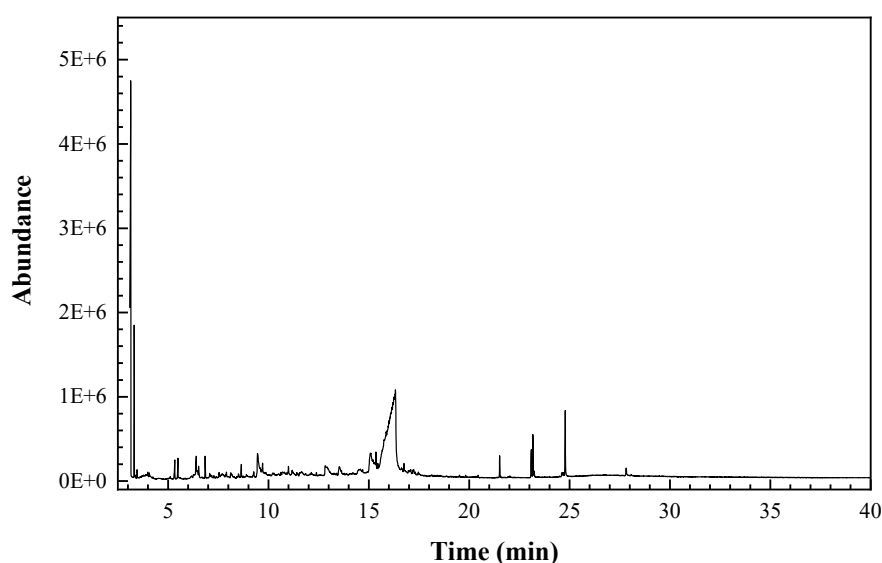

**Figure S1.** GC–MS chromatogram of *G. biloba* leaf hydromethanolic extract.

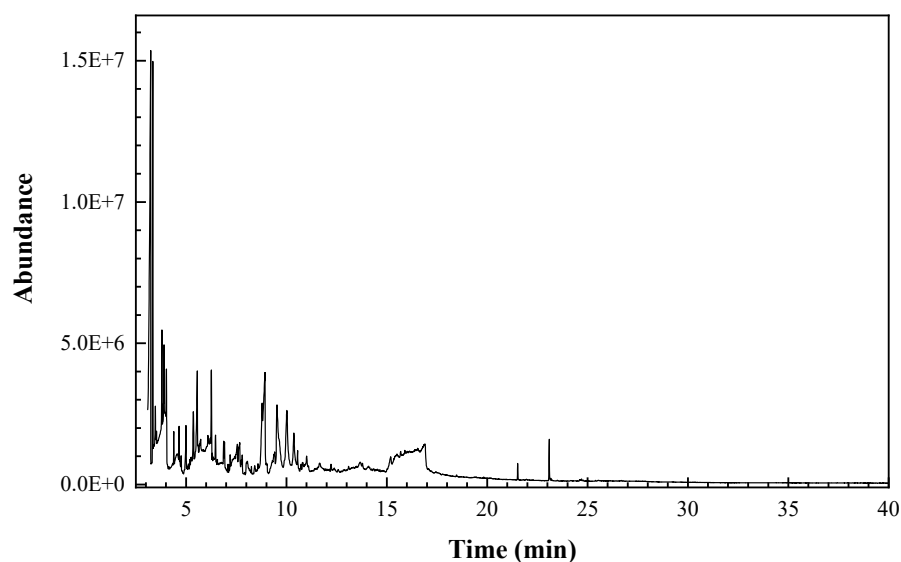

**Figure S2.** GC–MS chromatogram of *G. biloba* sarcotesta hydromethanolic extract.

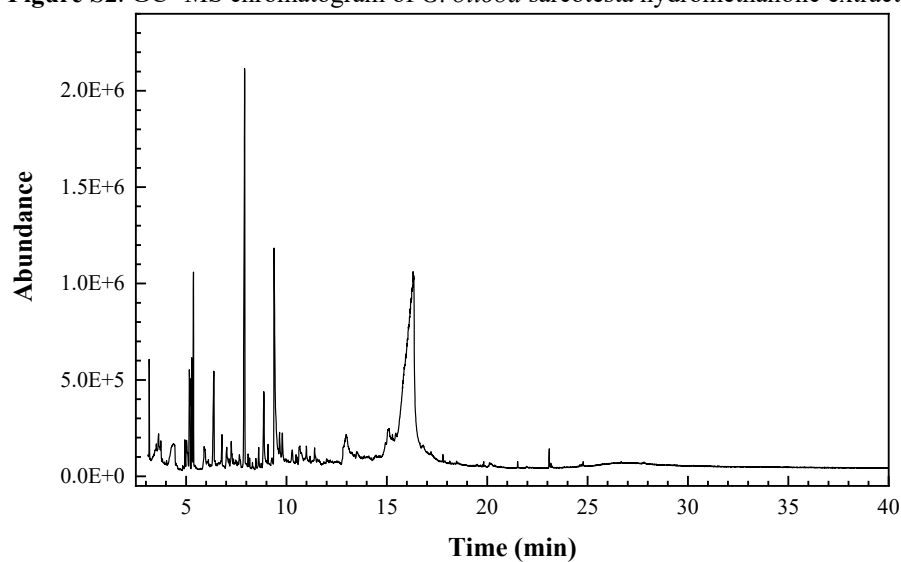

**Figure S3.** GC–MS chromatogram of *G. biloba* sclerotesta hydromethanolic extract.

**Table S1.** Constituents of *G. biloba* leaf hydromethanolic extract.

| RT<br>(min) | Area<br>(%) | Assignment                          | Qual |
|-------------|-------------|-------------------------------------|------|
| 3.1403      | 16.196      | Acetic acid                         | 91   |
| 3.3124      | 2.376       | 2-Propanone, 1-hydroxy-             | 72   |
| 3.4608      | 0.174       | Acetic acid, hydroxy-, methyl ester | 90   |
| 3.7813      | 0.168       | N-Acetylenediamine                  | 17   |
| 3.8882      | 0.229       | (3-Methyl-oxiran-2-yl)-methanol     | 27   |
| 3.9891      | 0.213       | 2,3-Butanediol                      | 47   |
| 4.0721      | 0.289       | 2,3-Butanediol                      | 47   |
| 5.1108      | 0.177       | Oxime-, methoxy-phenyl-             | 92   |
| 5.3304      | 0.644       | Butyrolactone                       | 87   |
| 5.4907      | 0.550       | 2-Cyclopenten-1-one, 2-hydroxy-     | 86   |
| 6.1495      | 0.130       | Phenol                              | 91   |
| 6.2801      | 0.321       | Glycerin                            | 72   |
| 6.3988      | 1.222       | 2-Hydroxy-gamma-butyrolactone       | 32   |
| 6.4641      | 0.437       | 1,2-Cyclohexanedione                | 64   |
| 6.5234      | 0.494       | 1,3-Cyclopentanedione               | 59   |
| 6.8499      | 0.651       | 3,4Dehydro-dl-proline               | 58   |

|         |        |                                                                                                           |    |
|---------|--------|-----------------------------------------------------------------------------------------------------------|----|
| 7.0813  | 0.242  | Pyrollidine, 2,5-bis(imino)-                                                                              | 47 |
| 7.1288  | 0.088  | Pantolactone                                                                                              | 38 |
| 7.2832  | 0.127  | 2,5-Dimethyl-4-hydroxy-3(2H)-furanone                                                                     | 41 |
| 7.5443  | 0.374  | 2-Pyrrolidinone                                                                                           | 58 |
| 7.6333  | 0.124  | 4-Aminopyrimidine                                                                                         | 38 |
| 7.6986  | 0.400  | Mequinol                                                                                                  | 70 |
| 7.8589  | 0.130  | But-3-enyl (E)-2-methylbut-2-enoate                                                                       | 59 |
| 7.9063  | 0.231  | l-Guanidinosuccinimide                                                                                    | 47 |
| 8.1260  | 0.326  | N-Methylallylamine                                                                                        | 35 |
| 8.1972  | 0.115  | Cyclohexanone, 2,3-dimethyl-                                                                              | 18 |
| 8.5117  | 0.173  | Ethyl-diethanolamine                                                                                      | 46 |
| 8.6483  | 0.476  | 4H-Pyran-4-one, 2,3-dihydro-3,5-dihydroxy-6-methyl-                                                       | 91 |
| 8.9035  | 0.234  | Cyclopentanone, 2-(1-methylpropyl)-                                                                       | 47 |
| 9.2715  | 0.238  | 4,6-Dimethyl-2-pyrimidone                                                                                 | 41 |
| 9.4614  | 2.481  | Catechol                                                                                                  | 97 |
| 9.5801  | 0.567  | Catechol                                                                                                  | 95 |
| 9.6632  | 0.301  | Catechol                                                                                                  | 70 |
| 9.7107  | 0.652  | Benzofuran, 2,3-dihydro-                                                                                  | 58 |
| 10.2271 | 0.304  | 2-Ethylacridine                                                                                           | 38 |
| 10.6247 | 0.246  | 2-Propen-1-one, 1-(2-hydroxy-3-methoxy-6-methylphenyl)-                                                   | 25 |
| 10.7137 | 0.431  | 4-(4-Methyl-[1,3,2]dioxaborinan-2-yloxy)-phenol                                                           | 59 |
| 10.8028 | 0.317  | 4-(4-Methyl-[1,3,2]dioxaborinan-2-yloxy)-phenol                                                           | 43 |
| 10.9987 | 0.535  | 2-Methoxy-4-vinylphenol                                                                                   | 76 |
| 11.1827 | 0.399  | 2,2-Dimethyl-1-aza-spiro[2.4]heptane                                                                      | 14 |
| 11.4082 | 0.125  | 2-Methoxy-6-methylaniline                                                                                 | 45 |
| 11.5863 | 0.186  | 1,3-Benzenediamine, 4-methyl-                                                                             | 49 |
| 11.6515 | 0.514  | 1,3-Benzenediamine, 4-methyl-                                                                             | 76 |
| 12.1382 | 0.064  | N,N-Diethylaniline                                                                                        | 45 |
| 12.3935 | 0.097  | 2-Pyridinamine, 3,6-dimethyl-                                                                             | 30 |
| 12.8386 | 0.634  | 1,2-Ethanediol, 1-phenyl-                                                                                 | 25 |
| 12.9157 | 0.357  | 1,3:2,5-Dimethylene-l-rhamnitol                                                                           | 37 |
| 12.9395 | 0.511  | Urea, N,N'-dibutyl-N,N'-dimethyl-                                                                         | 38 |
| 13.5271 | 0.926  | D-Allose                                                                                                  | 64 |
| 13.6399 | 0.240  | 1,2-Bis(3-oxobutyl)-3,3-dimethyldiaziridine                                                               | 45 |
| 14.5183 | 0.632  | $\beta$ -D-Glucopyranoside, methyl                                                                        | 64 |
| 14.5836 | 0.634  | $\beta$ -D-Glucopyranoside, methyl                                                                        | 64 |
| 14.6964 | 0.375  | Dodecanoic acid, 1-methylethyl ester                                                                      | 43 |
| 15.0881 | 3.772  | Ethanone, 1-cyclopentyl-                                                                                  | 35 |
| 15.2127 | 0.966  | D-Fucose                                                                                                  | 30 |
| 15.2780 | 0.505  | $\alpha$ -D-glucopyranosyl-(1 $\rightarrow$ 3)- $\alpha$ -D-fructofuranosyl $\alpha$ -D-galactopyranoside | 35 |
| 15.3136 | 0.422  | Butanoic acid, 3-methyl-, 1-methylethyl ester                                                             | 27 |
| 15.3611 | 1.194  | 1,5,5-Trimethyl-6-methylene-cyclohexene                                                                   | 49 |
| 15.4501 | 0.558  | 2-Azidomethyl-1,3,3-trimethyl-cyclohexene                                                                 | 83 |
| 15.8656 | 11.302 | D-Fructose, 3-O-methyl-                                                                                   | 50 |
| 15.9072 | 1.188  | D-Fructose, 3-O-methyl-                                                                                   | 50 |
| 15.9665 | 2.939  | D-Fructose, 3-O-methyl-                                                                                   | 50 |
| 16.0140 | 2.681  | D-Fructose, 3-O-methyl-                                                                                   | 38 |
| 16.1505 | 9.919  | 3-Hexanol, 2,4-dimethyl-                                                                                  | 35 |
| 16.2039 | 3.590  | 3-Hexanol, 2,4-dimethyl-                                                                                  | 38 |
| 16.2633 | 4.537  | 3-Hexanol, 2,4-dimethyl-                                                                                  | 38 |
| 16.3226 | 9.749  | 3-Methylmannoside                                                                                         | 43 |
| 16.7559 | 0.638  | $\alpha$ -Methyl 4-O-methyl-D-mannoside                                                                   | 38 |
| 16.9755 | 0.216  | (-)-R-Phenethanamine, 1-methyl-N-vanillyl-                                                                | 27 |
| 17.0883 | 0.279  | Benzenemethanamine, 4-fluoro-                                                                             | 18 |
| 17.1951 | 0.248  | 1,1-Diethyl-4-phenylsemicarbazide                                                                         | 38 |
| 17.2367 | 0.204  | Bicyclo[2.2.1]heptane-2-carboxylic acid, methyl ester                                                     | 27 |
| 17.4741 | 0.106  | Dipropyl propylphosphonate                                                                                | 25 |
| 21.5220 | 0.658  | Phenol, 3-pentadecyl-                                                                                     | 80 |
| 23.0889 | 0.830  | Acetic acid, 4-methylphenyl ester                                                                         | 52 |
| 23.1779 | 1.294  | Acetic acid, 4-methylphenyl ester                                                                         | 59 |

|         |       |                                                  |    |
|---------|-------|--------------------------------------------------|----|
| 23.2432 | 0.226 | Phenol, 3-pentadecyl-                            | 93 |
| 24.6083 | 0.123 | Phenol, 2-methyl-                                | 46 |
| 24.6499 | 0.153 | Acetic acid, 4-methylphenyl ester                | 46 |
| 24.7033 | 0.138 | Phenol, 3-pentadecyl-                            | 50 |
| 24.7864 | 2.089 | Acetic acid, 4-methylphenyl ester                | 43 |
| 27.8193 | 0.404 | Cyclohexane, 1,1'-(2-methyl-1,3-propanediyl)bis- | 49 |

The appearance of several peaks for the same compound (e.g., for catechol, 3-*O*-methyl-D-fructose, 3-2,4-dimethyl-hexanol, etc.) is tentatively ascribed to matrix-induced retention shifts.

**Table S2.** Constituents of *G. biloba* sarcotesta hydromethanolic extract.

| RT (min) | Area (%) | Assignment                                            | Qual |
|----------|----------|-------------------------------------------------------|------|
| 3.2353   | 10.223   | Acetic acid                                           | 91   |
| 3.3422   | 3.273    | 2-Propanone, 1-hydroxy-                               | 50   |
| 3.3837   | 0.305    | Formic acid, 2-methylpropyl ester                     | 42   |
| 3.4668   | 1.319    | Acetic acid, hydroxy-, methyl ester                   | 72   |
| 3.5321   | 0.699    | Acetamide, N-(2-hydroxyethyl)-                        | 43   |
| 3.7933   | 4.465    | 1-Hepten-4-ol                                         | 9    |
| 3.9060   | 3.138    | Formic acid, 2-methylpropyl ester                     | 37   |
| 3.9594   | 0.892    | Butanoic acid                                         | 58   |
| 4.0188   | 1.718    | Acetic acid                                           | 43   |
| 4.1434   | 0.171    | Formic acid, propyl ester                             | 10   |
| 4.3393   | 0.627    | 2-Furanmethanol                                       | 83   |
| 4.3868   | 0.460    | 1,2-diacetylhydrazine                                 | 40   |
| 4.5470   | 0.996    | 4-Cyclopentene-1,3-dione                              | 38   |
| 4.5767   | 0.427    | 3(2H)-Pyridazinone                                    | 35   |
| 4.6539   | 0.788    | 2-Furanmethanol                                       | 98   |
| 4.7548   | 0.368    | 2-Propanone, 1-(acetyloxy)-                           | 47   |
| 4.9981   | 0.896    | Ethanamine, 2-methoxy-N-(2-methoxyethyl)-N-methyl-    | 40   |
| 5.0456   | 0.146    | Acetamide, N,N'-carbonylbis-                          | 53   |
| 5.1228   | 0.257    | 1-(2-Hydroxyethoxy)-2-(vinylthio)ethane               | 50   |
| 5.1880   | 0.255    | Pentanoic acid, 3-hydroxy-4-methyl-, methyl ester     | 37   |
| 5.2474   | 0.231    | 1,2-Propanediol, 3-methoxy-                           | 45   |
| 5.2652   | 0.239    | (3-Methyl-oxiran-2-yl)-methanol                       | 50   |
| 5.3661   | 1.332    | 1H-Imidazole, 4,5-dihydro-2-methyl-                   | 40   |
| 5.5620   | 3.104    | 2-Cyclopenten-1-one, 2-hydroxy-                       | 86   |
| 5.6688   | 0.450    | Dihydroxyacetone                                      | 64   |
| 5.7282   | 1.275    | Dihydroxyacetone                                      | 53   |
| 5.8172   | 0.191    | Dihydroxyacetone                                      | 56   |
| 5.8469   | 0.661    | Dihydroxyacetone                                      | 59   |
| 5.9121   | 0.326    | Dihydroxyacetone                                      | 64   |
| 6.0309   | 1.026    | Dihydroxyacetone                                      | 56   |
| 6.0961   | 1.409    | Formic acid, 2-methylpropyl ester                     | 42   |
| 6.2030   | 0.783    | Ethyl $\alpha$ -d-glucopyranoside                     | 53   |
| 6.2623   | 1.311    | 2,4-Dihydroxy-2,5-dimethyl-3(2H)-furan-3-one          | 64   |
| 6.3098   | 0.285    | 2-Butanone, 4-hydroxy-3-methyl-                       | 55   |
| 6.3573   | 0.348    | Acetic acid, ethoxy-                                  | 50   |
| 6.4048   | 0.179    | Methyl-4-azido-4-desoxy $\beta$ -arabinopyranoside    | 72   |
| 6.4701   | 0.722    | 1H-1,2,4-Triazol-5-amine, 1-ethyl-                    | 47   |
| 6.5176   | 0.179    | Formic acid, 2-methylpropyl ester                     | 50   |
| 6.5591   | 0.368    | Glyceraldehyde                                        | 47   |
| 6.6600   | 0.292    | d-Glycero-d-galacto-heptose                           | 37   |
| 6.7075   | 0.169    | Glyceraldehyde                                        | 53   |
| 6.7609   | 0.571    | Glyceraldehyde                                        | 43   |
| 6.8737   | 0.468    | 3-Butyn-2-amine, 2-methyl-                            | 50   |
| 6.9211   | 0.579    | 1,2-Cyclopentanedione, 3-methyl-                      | 87   |
| 7.0933   | 0.156    | Acetamide, N-(aminoiminomethyl)-                      | 38   |
| 7.2001   | 0.305    | Propanoic acid, ethyl ester                           | 38   |
| 7.3069   | 0.465    | d-Glycero-d-galacto-heptose                           | 37   |
| 7.3366   | 0.142    | d-Mannitol, 1,4-anhydro-                              | 35   |
| 7.4316   | 0.700    | 5,9-Dodecadien-2-one, 6,10-dimethyl-, (E,E)-          | 38   |
| 7.5562   | 1.024    | 2,5-Dimethyl-4-hydroxy-3(2H)-furanone                 | 87   |
| 7.6275   | 0.516    | 1-Hydroxy-2-pentanone                                 | 30   |
| 7.6749   | 0.631    | 2-Furanmethanol, tetrahydro-                          | 50   |
| 7.7462   | 0.236    | Furyl hydroxymethyl ketone                            | 58   |
| 7.7996   | 0.318    | 2,5-Dimethyl-4-hydroxy-3(2H)-furanone                 | 32   |
| 8.0073   | 0.206    | N-Methoxy-1-ribofuranosyl-4-imidazolecarboxylic amide | 50   |
| 8.0489   | 0.423    | 1-Propanamine, N,2-dimethyl-                          | 50   |
| 8.1260   | 0.154    | l-Alanine, N-(3-methyl-1-oxobutyl)-, methyl ester     | 50   |
| 8.4228   | 0.306    | 2-Cyclohexen-1-ol, 4-amino-5,6-dimethoxy-             | 50   |

|         |       |                                                                             |    |
|---------|-------|-----------------------------------------------------------------------------|----|
| 8.5118  | 0.147 | 1-Undecene, 4-methyl-                                                       | 38 |
| 8.5831  | 0.186 | 2-Methyl-4,5-pyrimidinediamine                                              | 37 |
| 8.7908  | 2.076 | 4H-Pyran-4-one, 2,3-dihydro-3,5-dihydroxy-6-methyl-                         | 45 |
| 8.9332  | 3.859 | 4H-Pyran-4-one, 2,3-dihydro-3,5-dihydroxy-6-methyl-                         | 91 |
| 9.0104  | 0.184 | Benzoic acid                                                                | 96 |
| 9.0401  | 0.171 | Benzoic acid                                                                | 92 |
| 9.3072  | 0.735 | 2(3H)-Furanone, dihydro-4-hydroxy-                                          | 68 |
| 9.3784  | 0.401 | 4H-Pyran-4-one, 3,5-dihydroxy-2-methyl-                                     | 64 |
| 9.4140  | 0.436 | 4H-Pyran-4-one, 3,5-dihydroxy-2-methyl-                                     | 78 |
| 9.5267  | 4.145 | Catechol                                                                    | 94 |
| 10.0253 | 3.569 | 5-Hydroxymethylfurfural                                                     | 91 |
| 10.2331 | 0.253 | Butane, 1-(1-methylethoxy)-                                                 | 22 |
| 10.3696 | 1.908 | 4H-Pyran-4-one, 2,6-dimethyl-                                               | 9  |
| 10.5536 | 0.477 | Benzenethiol, o-isopropyl-,                                                 | 74 |
| 10.7316 | 0.312 | Ethanone, 1-cyclopentyl-                                                    | 35 |
| 10.8028 | 0.474 | Isobutyl-2-heptenone                                                        | 12 |
| 10.9216 | 0.220 | 3-(1-Chloroethenyl)-3-methyl-1,2,4-trioxolane                               | 10 |
| 11.0106 | 0.716 | 5H-Cyclohepta-1,4-dioxin, 2,3,4a,6,7,9a-hexahydro-, cis-                    | 14 |
| 11.0937 | 0.263 | E-8-Methyl-7-dodecen-1-ol acetate                                           | 27 |
| 11.2243 | 0.159 | $\alpha$ -D-Glucopyranoside, methyl-2,3,4-tri-O-acetyl-6-O-heptyl-          | 38 |
| 11.4261 | 0.256 | 1,1-Dodecanediol, diacetate                                                 | 38 |
| 11.5032 | 0.199 | 5-Aminovaleric acid                                                         | 50 |
| 11.5744 | 0.197 | Butane, 1-(1-methylethoxy)-                                                 | 38 |
| 11.6575 | 0.799 | Ethanol, 2-bromo-                                                           | 25 |
| 11.8178 | 0.224 | Formic acid, 1-methylethyl ester                                            | 35 |
| 12.0315 | 0.140 | 2-(2-Methylcyclopropyl)thiophene                                            | 43 |
| 12.1324 | 0.161 | Pentanol, 5-amino-                                                          | 27 |
| 12.2214 | 0.299 | 2-Norbornyl acetate                                                         | 38 |
| 12.3816 | 0.255 | 2-Butyne, 4-acetoxy-1-(9-borabicyclo[3.3.1]non-9-yl)oxy-                    | 32 |
| 12.5775 | 0.266 | 1,4-Diacetyl-3-acetoxymethyl-2,5-methylene- $\beta$ -D-rhamnitol            | 45 |
| 12.8268 | 0.184 | p-Menthane-1,3-diol                                                         | 38 |
| 12.8802 | 0.195 | 2-Propenoic acid, 2-(acetylamino)-                                          | 11 |
| 13.0286 | 0.149 | 7-Octene-2,4-dione                                                          | 11 |
| 13.0998 | 0.308 | Ethanone, 1-(2,3,4-trihydroxyphenyl)-                                       | 38 |
| 13.2482 | 0.295 | $\beta$ -L-Lyx-Hexopyranose, 3-(acetylamino)-2,3,6-trideoxy-, 1,4-diacetate | 27 |
| 13.4322 | 0.217 | Decane, 1-fluoro-                                                           | 18 |
| 13.4797 | 0.240 | Butanoic acid, 3-oxo-, 2-hydroxyethyl ester                                 | 22 |
| 13.6815 | 0.892 | Benzoic acid, 3-hydroxy-                                                    | 90 |
| 13.7883 | 0.452 | Acetic acid, 2-(4-methylphenyl)-hydrazide                                   | 38 |
| 14.0554 | 0.349 | Tetraacetyl-D-glucosamine                                                   | 25 |
| 14.0969 | 0.190 | 2-[1,2-Dihydroxyethyl]-9-[ $\beta$ -D-ribofuranosyl]hypoxanthine            | 25 |
| 14.1385 | 0.264 | Trichloroacetic acid, hexadecyl ester                                       | 20 |
| 14.2513 | 0.185 | trans-2-Dodecenoic acid                                                     | 22 |
| 14.5124 | 0.362 | Methane, phenoxypropoxy-                                                    | 25 |
| 14.6549 | 0.153 | 1,2-Cyclohexanedimethanol, 3-(acetyloxy)-1,2-dimethyl-, diacetate           | 14 |
| 14.8151 | 0.207 | 2H-Pyran-5-carboxylic acid, 6-methyl-2-oxo-, methyl ester                   | 22 |
| 15.0169 | 0.177 | Isosorbide Dinitrate                                                        | 10 |
| 15.1950 | 1.082 | Azelaic acid                                                                | 87 |
| 15.4087 | 0.993 | D-Fucose                                                                    | 35 |
| 15.4739 | 0.353 | D-Fucose                                                                    | 27 |
| 15.5036 | 1.112 | Galacto-heptulose                                                           | 38 |
| 15.6935 | 0.767 | D-erythro-Pentose, 2-deoxy-                                                 | 27 |
| 15.7766 | 0.432 | 3-Hydroxy-N,N-dimethylpropanamide                                           | 46 |
| 15.8063 | 0.141 | 3-Deoxy-D-mannoic lactone                                                   | 58 |
| 15.8657 | 0.453 | exo-1,2-O-Ethylidene- $\alpha$ -D-erythrofuranose                           | 27 |
| 15.9013 | 0.603 | Oxirane, 2,3-dimethyl-, trans-                                              | 27 |
| 15.9547 | 0.236 | 3-Hydroxy-N,N-dimethylpropanamide                                           | 46 |
| 16.0141 | 0.615 | 3-Hydroxy-N,N-dimethylpropanamide                                           | 35 |
| 16.0556 | 0.277 | 3-Deoxy-D-mannoic lactone                                                   | 53 |
| 16.1268 | 0.582 | 2R,3S-9-[1,3,4-Trihydroxy-2-butoxymethyl]guanine                            | 49 |

|         |       |                                                 |    |
|---------|-------|-------------------------------------------------|----|
| 16.1565 | 0.575 | d-Mannitol, 1,4-anhydro-                        | 38 |
| 16.2337 | 0.449 | 3-Deoxy-d-mannitol                              | 49 |
| 16.3405 | 0.734 | 3-Deoxy-d-mannoic lactone                       | 46 |
| 16.3939 | 0.622 | Hydroperoxide, 1,4-dioxan-2-yl                  | 47 |
| 16.4295 | 0.265 | N,N-Dimethylvaleramide                          | 47 |
| 16.4770 | 0.483 | Butanoic acid, 3-chloro-                        | 46 |
| 16.5363 | 0.888 | 2-Butenoic acid, 4-hydroxy-, methyl ester       | 43 |
| 16.6847 | 0.322 | Thiophene, tetrahydro-2-methyl-                 | 50 |
| 16.8153 | 1.256 | $\alpha$ -Methyl mannofuranoside                | 38 |
| 16.8984 | 1.554 | 4,6-Di-O-methyl- $\alpha$ -d-galactose          | 59 |
| 17.4504 | 0.212 | (1R,2S)-2-Acetyl-1-methylcyclobutaneacetic acid | 30 |
| 21.5220 | 0.144 | Phenol, 3-pentadecyl-                           | 72 |
| 23.0949 | 0.384 | Phenol, 3-pentadecyl-                           | 59 |

The appearance of several peaks for the same compound (e.g., for 2,3-dihydro-3,5-dihydroxy-6-methyl-4H-pyran-4-one, dihydroxyacetone, etc.) is tentatively ascribed to matrix-induced retention shifts.

**Table S3.** Constituents of *G. biloba* sclerotesta hydromethanolic extract.

| RT<br>(min) | Area<br>(%) | Assignment                                                     | Qual |
|-------------|-------------|----------------------------------------------------------------|------|
| 3.1700      | 0.796       | Acetic acid, hydroxy-, methyl ester                            | 91   |
| 3.5202      | 1.068       | n-Capric acid isopropyl ester                                  | 43   |
| 3.6330      | 1.316       | Hexane, 1-(ethenyloxy)-                                        | 25   |
| 3.7398      | 0.444       | Ethanol, 2-(1-methylethoxy)-                                   | 39   |
| 4.3689      | 2.140       | 2-Furanmethanol                                                | 98   |
| 4.4402      | 0.308       | 2-Furanmethanol                                                | 98   |
| 4.9387      | 0.429       | Oxime-, methoxy-phenyl-                                        | 91   |
| 5.0278      | 0.787       | Dihydroxyacetone                                               | 83   |
| 5.0752      | 0.294       | 1,3-Dihydroxyacetone dimer                                     | 47   |
| 5.1702      | 1.502       | 2(5H)-Furanone                                                 | 80   |
| 5.1939      | 0.981       | Butyrolactone                                                  | 87   |
| 5.2830      | 1.486       | Cyclobutane, methyl-                                           | 47   |
| 5.3661      | 2.437       | 2-Cyclopenten-1-one, 2-hydroxy-                                | 87   |
| 5.9062      | 0.574       | Hexanoic acid                                                  | 43   |
| 5.9418      | 0.601       | Rhamnose                                                       | 64   |
| 6.3810      | 2.749       | 2-Hydroxy-gamma-butyrolactone                                  | 42   |
| 6.7846      | 0.868       | 2-Cyclopenten-1-one, 2-hydroxy-3-methyl-                       | 94   |
| 7.0279      | 0.926       | 1,2-Pyrrolidinedicarboxylic acid, 1-(phenylmethyl) ester, (S)- | 38   |
| 7.1467      | 0.199       | L-Talose, 6-deoxy-3-C-methyl-2-O-methyl-                       | 37   |
| 7.2535      | 0.983       | 2,5-Dimethyl-4-hydroxy-3(2H)-furanone                          | 50   |
| 7.3663      | 0.181       | Ethanone, 1-(1H-pyrrol-2-yl)-                                  | 55   |
| 7.6571      | 0.382       | 3,5-Octadien-2-one, (E,E)-                                     | 58   |
| 7.9242      | 9.470       | 2(3H)-Furanone, dihydro-4-hydroxy-                             | 56   |
| 8.0963      | 0.289       | Maltol                                                         | 70   |
| 8.1675      | 0.177       | 2-Cyclopenten-1-one, 3-ethyl-2-hydroxy-                        | 92   |
| 8.3100      | 0.150       | [1,3]Diazepan-2,4-dione                                        | 64   |
| 8.4762      | 0.229       | 2-Propanamine, N-methyl-N-nitroso-                             | 49   |
| 8.6186      | 0.430       | 4H-Pyran-4-one, 2,3-dihydro-3,5-dihydroxy-6-methyl-            | 87   |
| 8.7432      | 0.078       | 1,4-Butanediol                                                 | 27   |
| 8.8798      | 2.218       | 2(3H)-Furanone, dihydro-4-hydroxy-                             | 47   |
| 9.0163      | 0.082       | 1,4-Butanediamine, N-(3-aminopropyl)-                          | 43   |
| 9.2834      | 0.226       | Glycyl-L-valine, N-dimethylaminomethylene-, methyl ester       | 53   |
| 9.3902      | 7.911       | Catechol                                                       | 96   |
| 9.6573      | 0.816       | Methanone, dicyclopropyl-                                      | 38   |
| 9.7938      | 0.776       | 5-Hydroxymethylfurfural                                        | 86   |
| 10.2924     | 0.446       | 1,2-Benzenediol, 3-methyl-                                     | 93   |
| 10.4764     | 0.144       | 3(2H)-Furanone, dihydro-2-methyl-                              | 35   |
| 10.5238     | 0.108       | Ethanone, 1-(2,5-dihydroxyphenyl)-                             | 60   |
| 10.6366     | 0.267       | Hydroquinone                                                   | 76   |
| 10.6722     | 0.645       | Hydroquinone                                                   | 70   |
| 10.7494     | 0.443       | Resorcinol                                                     | 38   |

|         |       |                                                                                                               |    |
|---------|-------|---------------------------------------------------------------------------------------------------------------|----|
| 10.9927 | 0.634 | 2-Methoxy-4-vinylphenol                                                                                       | 76 |
| 11.1767 | 0.103 | 2-Pyridinamine, 3-methyl-                                                                                     | 35 |
| 11.4023 | 0.138 | 1-Phenylthio-3-acetoxy-2-butanone                                                                             | 22 |
| 12.0077 | 0.051 | 2-(1-Methylcyclopropyl)thiophene                                                                              | 49 |
| 12.9751 | 2.901 | 1,4-Dioxane-2,6-dimethanol                                                                                    | 37 |
| 13.0938 | 0.555 | Urea, N,N'-dibutyl-N,N'-dimethyl-                                                                             | 38 |
| 13.5034 | 0.184 | Rhamnose                                                                                                      | 38 |
| 14.9338 | 0.548 | Polygalitol                                                                                                   | 41 |
| 14.9575 | 0.212 | D-erythro-Pentose, 2-deoxy-                                                                                   | 38 |
| 15.0643 | 1.056 | 3-Methylmannoside                                                                                             | 53 |
| 15.1178 | 1.272 | 2-Hydroxyethylphosphine                                                                                       | 38 |
| 15.2187 | 0.303 | L-Lyxose                                                                                                      | 46 |
| 15.2840 | 0.777 | 3-Deoxy-d-mannitol                                                                                            | 43 |
| 15.4502 | 0.940 | 2R,3S-9-[[1,3-Dihydroxy-4-fluoro-3-butoxy]methyl]guanine                                                      | 43 |
| 15.8715 | 8.384 | 4,6-Di-O-methyl- $\alpha$ -d-galactose                                                                        | 58 |
| 15.8953 | 1.220 | 9,11-Octadecadiynoic acid, 8-hydroxy-, methyl ester                                                           | 53 |
| 15.9368 | 1.912 | D-Fructose, 3-O-methyl-                                                                                       | 47 |
| 16.0021 | 3.037 | Thiophene, tetrahydro-2-methyl-                                                                               | 50 |
| 16.0793 | 4.221 | D-Fructose, 3-O-methyl-                                                                                       | 50 |
| 16.1980 | 7.962 | $\alpha$ -D-Xylofuranoside, methyl 2-O-methyl-                                                                | 38 |
| 16.2633 | 5.252 | 3-Methylmannoside                                                                                             | 43 |
| 16.3167 | 4.208 | $\alpha$ -D-Xylofuranoside, methyl 2-O-methyl-                                                                | 38 |
| 16.3464 | 6.895 | $\alpha$ -D-Xylofuranoside, methyl 2-O-methyl-                                                                | 38 |
| 17.7946 | 0.085 | 2(1H)-Naphthalenone, octahydro-4a-methyl-7-(1-methylethyl)-, (4 $\alpha\alpha$ ,7 $\beta$ ,8 $\alpha\beta$ )- | 53 |
| 21.5220 | 0.092 | Carbamic acid, methyl-, 3-methylphenyl ester                                                                  | 53 |
| 23.0889 | 0.259 | Phenol, 3-pentadecyl-                                                                                         | 64 |

The existence of several peaks for the same compound (e.g., for  $\alpha$ -D-xylofuranoside, methyl 2-O-methyl) is tentatively ascribed to matrix-induced retention shifts.
